1 **Ecological consequences of urbanization on a legume-rhizobia mutualism**

2

3 David Murray-Stoker<sup>1,2,3,\*</sup> and Marc T. J. Johnson<sup>2,3</sup>

4

5 <sup>1</sup>Department of Ecology and Evolutionary Biology, University of Toronto, Toronto, Ontario

6 M5S 3B2, Canada

7 <sup>2</sup>Department of Biology, University of Toronto Mississauga, Mississauga, Ontario, Canada L5L

8 1C6

9 <sup>3</sup>Centre for Urban Environments, University of Toronto Mississauga, Mississauga, Ontario,

10 Canada L5L 1C6

11 \*Corresponding author: David Murray-Stoker [dstoker92@gmail.com](mailto:dstoker92@gmail.com)

12

13 David Murray-Stoker, ORCID <https://orcid.org/0000-0002-4774-6948>

14 Marc T. J. Johnson, ORCID <http://orcid.org/0000-0001-9719-0522>

15 **Abstract**

16 Mutualisms are key determinants of community assembly and composition, but urbanization can  
17 alter the dynamics of these interactions and associated effects on ecosystem functions. Legume-  
18 rhizobia mutualisms are a model interaction to evaluate the ecological and ecosystem-level  
19 effects of urbanization, particularly urban-driven eutrophication and nitrogen (N) deposition.  
20 Here, we evaluated how urbanization affected the ecology of the mutualism between white  
21 clover (*Trifolium repens*) and its rhizobial symbiont (*Rhizobium leguminosarum* symbiovar  
22 *trifolii*) along an urbanization gradient. We found that the abundance of rhizobium nodules on  
23 white clover decreased with urbanization. White clover acquired N from mixed sources of N  
24 fixation and uptake from the soil for the majority of the urbanization gradient, but white clover  
25 primarily acquired N from the soil rather than N fixation by rhizobia at the urban and rural limits  
26 of the gradient. Importantly, we identified soil N as a critical nexus for urban-driven changes in  
27 the white clover-rhizobium mutualism. Taken together, our results demonstrate that urbanization  
28 alters the ecological consequences of a legume-rhizobium mutualism, with direct and indirect  
29 effects of the urban landscape on an ecologically-important mutualistic interaction.

30 **Keywords:** mutualism, nitrogen, stable isotopes, urban ecology

## 31 **Introduction**

32 Urbanization is a major driver of ecosystem change at local and global scales, consistently  
33 altering the ecological setting in terms of both biotic and abiotic factors (Grimm et al. 2008, Seto  
34 et al. 2010). Biotic changes frequently include fragmented habitats, homogenization of species  
35 composition, reduced abundance and diversity of native species, reduced vegetation cover, and  
36 increased abundance of non-native species (McKinney 2002, Grimm et al. 2008, Groffman et al.  
37 2014, Aronson et al. 2016). Common changes to the abiotic environment include increased  
38 impervious surface cover, elevated temperatures, higher pollution levels (e.g., air, water, light,  
39 noise), and increased nutrient deposition (Grimm et al. 2008, Groffman et al. 2014, Stevens et al.  
40 2018). However, there is limited research regarding the direct and indirect impacts of biotic and  
41 abiotic changes on species interactions in urban environments (Youngsteadt et al. 2015, Miles et  
42 al. 2019). Elucidating how urbanization affects the ecological consequences of species  
43 interactions is important for understanding the drivers of biodiversity and ecosystem change in  
44 urban environments.

45       Species interactions are key determinants of community composition (Wisz et al. 2013,  
46 Leibold and Chase 2017), but urbanization can disrupt these interactions (Raupp et al. 2010,  
47 Aronson et al. 2016, Miles et al. 2019) and their associated ecosystem functions (Ziter 2016). In  
48 urban landscapes, natural habitats are frequently fragmented and degraded, which can result in  
49 reduced species diversity and altered community composition (Williams et al. 2009, Aronson et  
50 al. 2016). Such ecological changes can alter antagonistic interactions (e.g., predator-prey, host-  
51 parasite; Rocha and Fellowes 2018, Parsons et al. 2019), competition (De León et al. 2019,  
52 Thomson and Page 2020), and mutualisms (Irwin et al. 2014, Rocha and Fellowes 2018, Rivkin  
53 et al. 2020). Mutualisms can be important for community and ecosystem stability, and

54 disruptions to these interactions caused by urbanization may be particularly problematic for  
55 maintaining ecosystem functions. For example, pollinator abundance, diversity, and composition  
56 often change with urbanization (Harrison et al. 2018, Santangelo et al. 2020), which can shift the  
57 balance of the benefits conveyed between interacting plants and pollinators (Irwin et al. 2014,  
58 Rivkin et al. 2020, Santangelo et al. 2020). As another example, plant-microbe interactions are  
59 important for community assembly and nutrient cycling (van der Heijden et al. 2008), and  
60 urbanization can affect these interactions through altered soil chemistry mediated by pollution  
61 and nutrient deposition (Grimm et al. 2008, Stevens et al. 2018). As plant-microbe interactions  
62 are frequently nutrient-provisioning mutualisms, pollution and nutrient deposition that cause  
63 changes in the diversity and composition of microbial communities can have cascading effects  
64 on nutrient cycles in urban ecosystems (Galloway et al. 2003, Kaye et al. 2006). More broadly, if  
65 urbanization frequently alters mutualistic interactions, this may have cascading effects on  
66 communities and ecosystems.

67 Mutualisms between legumes and rhizobia are an ideal system for evaluating the ecological  
68 impacts of urbanization on species interactions. In these mutualisms, rhizobia fix atmospheric  
69 nitrogen in exchange for photosynthate and housing in nodules by their host plant (Hirsch 1992,  
70 Poole et al. 2018). Urbanization can disrupt these interactions, specifically through nitrogen (N)  
71 deposition and enrichment (Grimm et al. 2008, Zhang et al. 2012). Nitrogen deposition can  
72 inhibit the formation of nodules (Streeter and Wong 1988, Omrane and Chiurazzi 2009),  
73 precluding the development of the mutualism or reducing plant reliance on rhizobia for  
74 providing N (Vergeer et al. 2008, Weese et al. 2015, Regus et al. 2017). Additionally, N  
75 deposition can reduce N fixation rates by rhizobia (Cleland and Harpole 2010, Zheng et al.  
76 2019). Although N deposition and short-term application of nutrient-rich fertilizers can benefit

77 both legumes and rhizobia (Simonsen et al. 2015, Forrester and Ashman 2018), chronic and  
78 long-term exposure to increased N can reduce the ecological benefits of N fixation and cause the  
79 evolution of less beneficial rhizobia (Weese et al. 2015, Regus et al. 2017). Using the legume-  
80 rhizobia mutualism as a model system, it is possible to study how urbanization and nutrient  
81 deposition alter interactions in an ecologically-important mutualism.

82 In this study, we evaluated the hypothesis that urbanization alters the ecological and  
83 ecosystem-level consequences of a nutrient-provisioning mutualism. We used the mutualism  
84 between the legume white clover (*Trifolium repens*) and its rhizobial symbiont (*Rhizobium*  
85 *leguminosarum* symbiovar *trifolii*) as a tractable model interaction. We conducted our study  
86 along an urbanization gradient in Toronto, Canada (Fig. 1). Our study focused on three primary  
87 questions: (Q1) does rhizobia nodulation vary along an urbanization gradient? (Q2) How does  
88 the source of plant nitrogen (i.e., from soil or gaseous N<sub>2</sub> fixed by rhizobia) change along the  
89 urbanization gradient? And (Q3) how do urban landscape features influence the interactions  
90 between soil N, plant N, and rhizobia nodulation? We predicted that: (1) urbanization would alter  
91 investment in rhizobia by *T. repens*, causing increased nodulation with decreased urbanization;  
92 (2) increased N availability in the soil due to urbanization would reduce N fixation by rhizobia  
93 and alter the source of N for *T. repens*; and (3) the changes in landscape features associated with  
94 urbanization cause direct and indirect effects on ecosystem structure and the white clover-  
95 rhizobium mutualism (Fig. 2).

## 96 **Materials and Methods**

### 97 *Land acknowledgement*

98 We conducted our sampling at 49 sites along an urbanization gradient in the Greater Toronto  
99 Area of Ontario, Canada in August 2018 (Fig. 1). Our sampling was conducted on the traditional

100 land of the Huron-Wendat, the Seneca, and most recently, the Mississaugas of the Credit First  
101 Nation.

### 102 *Study organisms*

103 White clover (*Trifolium repens* L., Fabaceae) is a perennial, herbaceous legume native to Eurasia  
104 that is now globally distributed (Baker and Williams 1987). White clover typically reproduces  
105 clonally through stolons (Kemball and Marshall 1995) as well as through seed via obligately-  
106 outcrossed flowers (Barrett and Silander 1992). *Rhizobium leguminosarum* symbiovar *trifolii* is  
107 the primary rhizobial symbiont of *T. repens* (Martínez-Romero and Caballero-Mellado 1996,  
108 Andrews and Andrews 2017). As a facultative symbiont, *R. l. bv. trifolii* fixes atmospheric N<sub>2</sub>  
109 into accessible NH<sub>3</sub> for white clover in exchange for photosynthate and hosting within root  
110 nodules.

111 Nodulation is initiated when rhizobia attach to and penetrate the root. After infection of  
112 the root they continue to divide within the plant host cells to form nodules (Poole et al. 2018). At  
113 this stage, rhizobia differentiate into bacteroids and begin the N fixation process, whereby  
114 atmospheric N<sub>2</sub> is converted into NH<sub>3</sub> by bacteroids with the aid of nitrogenase enzymes (Hirsch  
115 1992, Poole et al. 2018). Urbanization and specifically N enrichment can inhibit nodulation at  
116 multiple steps of the process. For example, NO<sub>3</sub> and NH<sub>3</sub> can inhibit rhizobia infection of roots,  
117 the formation of nodules, or the activity of nitrogenase (Streeter and Wong 1988, Omrane and  
118 Chiurazzi 2009). Another common mechanism for reduced nodulation with increased N  
119 availability is plant hosts switching N sources from N fixed by rhizobia to N taken up directly  
120 from the soil, resulting in lower nodulation and less investment in the symbiosis (Heath et al.  
121 2010, Regus et al. 2017).

### 122 *Field sampling*

123 Field collections of white clover, associated rhizobia, and soil samples were collected at all 49  
124 sites along the urbanization gradient (Fig. 2). At each site, 9-10 clover individuals and associated  
125 roots and nodules were collected (mean  $\pm$  SE = 9.94  $\pm$  0.13 individuals). Twenty soil cores were  
126 also taken at each sampling location, with 10 cores taken immediately adjacent to collected white  
127 clover and 10 taken at least 5 m from the nearest white clover plant (hereafter “bulk” cores), with  
128 the requirement that bulk cores did not contain other nitrogen-fixing legumes (e.g., *Medicago*  
129 *lupulina*). Each soil core was taken to a depth of 5 cm, and the top 2 cm plus organic material  
130 were removed because they could confound estimates of soil nutrients. Each sample type (bulk  
131 and adjacent) was combined for a composite sample of each soil core type per site, which was  
132 stored at  $-80^{\circ}\text{C}$  until subsequent processing.

### 133 *Lab processing*

134 *Nodule quantification:* White clover samples were separated into leaf and root tissue. Leaf tissue  
135 was collected for stable isotope analyses by cutting 6-10 fully expanded, green, non-senescent  
136 leaves from each individual, which were placed into a 2 mL tube and stored in a freezer at  $-20^{\circ}\text{C}$   
137 until later processing. Root tissue was collected by cutting the first five roots below the plant  
138 base and directly attached to the stolon. Roots were measured to the nearest 1 mm until at least  
139 10 cm of root length was measured or all collected roots were measured (root length: mean  $\pm$  SE  
140 = 10.3  $\pm$  0.13, range = 1.8-17.7 cm). Nodules were counted visually for each measured root, and  
141 counts were standardized by the total length of root measured to generate an estimate of nodule  
142 density per cm of root per plant.

143 *Soil sample processing:* Soil samples were prepared for N analyses by filtering, grinding,  
144 homogenizing, and drying samples. Samples were taken out of storage in the freezer at  $-80^{\circ}\text{C}$   
145 and thawed overnight in the lab ( $21.5^{\circ}\text{C}$ ). Each sample was then filtered over stacked sieves

146 (mesh diameters: 4.75 mm, 2 mm, 1 mm, and 0.5 mm) to remove large rocks and gravel. Soil  
147 retained on the 0.5 mm sieve and catch pan was collected, and then samples were dried and  
148 stored at 60°C for 48 hrs. Samples were homogenized into a fine powder using mortar and pestle  
149 and stored in a drying oven at 60°C for approximately 4 weeks until later processing. Adjacent  
150 soil N provided an estimate of N available to white clover individuals and potentially affected by  
151 N-fixing rhizobia, and bulk soil N was a measure of background N availability at the site.

152 *Leaf processing:* Leaf samples were prepared for N analyses by freeze-drying, grinding, and  
153 drying the tissue. A composite sample for each population was prepared by taking one leaf from  
154 each of the white clover individuals per site and the composite samples were freeze-dried and  
155 then homogenized using a tissue grinder (FastPrep 96, MP Biomedicals, Irvine, CA, USA).

156 Samples were dried and stored in a drying oven to achieve a constant mass at 60°C for 24-48 hrs  
157 until later processing.

158 *Soil and plant N analyses:* Soil and plant samples were weighed (soil  $\approx$  30 mg, plant  $\approx$  2 mg) on  
159 a micro-balance (XP2U Mettler Toledo, Mississauga, ON, Canada ) and packed into aluminum  
160 capsules (Costech Analytical Technologies Inc., Valencia, CA, USA). Soil samples were  
161 analyzed for % N using a Carlo Erba NA 1500C/H/N Analyzer (Carlo Erba Strumentazione,  
162 Milan, Italy). Plant tissue was simultaneously analyzed for % N and N isotopes (i.e.,  $^{15/14}\text{N}$ )  
163 using a Carlo Erba NA 1500C/H/N Analyzer coupled to a Thermo Delta V IRMS system  
164 (Thermo Fisher Scientific, Waltham, MA, USA). Nitrogen stable isotopes were expressed  
165 relative to a standard in  $\delta$  notation:

$$166 \quad \delta = [(R_{sample} - R_{standard}) - 1] \times 1000\text{‰}$$

167 where R represents the ratio of  $^{15}\text{N}$  to  $^{14}\text{N}$ . Plants depleted in  $\delta^{15}\text{N}$  (i.e., lower  $\delta^{15}\text{N}$ ) suggests N  
168 acquisition primarily from N fixation, while plants enriched in  $\delta^{15}\text{N}$  (i.e., higher  $\delta^{15}\text{N}$ ) suggests N



169 acquisition primarily from the soil (Högberg 1997, Craine et al. 2015). All elemental and stable  
170 isotope analyses were conducted at the Stable Isotope Ecology Laboratory at the University of  
171 Georgia, USA (<http://siel.uga.edu/>).

#### 172 *Landscape metrics*

173 Land use and land cover metrics were calculated for each site to quantify urbanization. We  
174 calculated percent impervious surface cover (ISC) manually using Google Earth Pro 7.3.2.5776  
175 (Google Inc., Mountain View, CA, USA) by drawing a 100-m radius around each site and using  
176 the polygon tool to draw and measure ISC. We also calculated the normalized difference  
177 vegetation index (NDVI), a measure of vegetation cover or site ‘greenness’, for each site using  
178 landsat imagery. We calculated NDVI from 1 June to 31 August at 16-day intervals for each year  
179 from 2014-2018 to generate a mean NDVI for each site; NDVI was measured at a spatial  
180 resolution of 250 m. Each site received 6 measurements per year, for a total of 30 measurements.  
181 NDVI was calculated using the “MODISTools” package (version 1.1.1; Tuck et al. 2014).  
182 Finally, for each site, we calculated the distance from the urban center as the distance on an  
183 ellipsoid (i.e., geodesic distance) using the “geosphere” package (version 1.5-10; Hijmans 2019);  
184 coordinates for the urban center were selected as Toronto City Hall (43.651536°N, -  
185 79.383276°W). Distance from the urban center has been shown to be correlated with multiple  
186 measures of urbanization in Toronto, and it has been identified as an important predictor of the  
187 ecological and evolutionary effects of urbanization in other studies (Thompson et al. 2016,  
188 Johnson et al. 2018, Rivkin et al. 2020).

#### 189 *Statistical analyses*

190 *Nodule density mixed-effects models:* We used linear mixed-effects models to analyze the  
191 response of nodule density against distance from the urban center, percent ISC, and NDVI. We  
192 fitted the linear mixed-effects models as:

$$193 \quad \text{nodule density} = \text{intercept} + x_i + (1 \mid \text{site}) + e_i$$

194 where nodule density was the response,  $x_i$  was the fixed effect (distance from the urban center,  
195 percent ISC, or NDVI), site was a random effect, and  $e_i$  was the residual error associated with the  
196 fixed effect. A full model with all predictor variables was not fitted because high  
197 multicollinearity between variables (Pearson  $r > |0.5|$ ) made it difficult to disentangle the effects  
198 of individual variables (Supplementary material Appendix 1 Fig. A1). Instead, we used structural  
199 equation modelling (see below) to integrate the variables into a single analysis.

200 All linear mixed-effects models were fitted using the “lme4” (version 1.1-25, Bates et al.  
201 2015) and “lmerTest” (version 3.1-2; Kuznetsova et al. 2017) packages, with models estimated  
202 using restricted maximum likelihood. We calculated partial  $F$ -tests of fixed effects using Type II  
203 sums of squares, and denominator degrees of freedom were approximated using the Satterthwaite  
204 correction for finite sample sizes (Satterthwaite 1946). Response and predictor variables were  
205 standardized to a mean of 0 and standard deviation of 1 prior to analyses, and model assumptions  
206 were inspected using the DHARMA package (version 0.3.3.0; Hartig 2020). Conditional  $R^2$ , a  
207 measure of the variance explained by the fixed and random effects (Nakagawa et al. 2017), was  
208 calculated for the models using the “r.squaredGLMM()” function in the “MuMIn” package  
209 (version 1.43.17; Barton 2020).

210 *White clover  $\delta^{15}N$  and soil N generalized additive models:* Changes in white clover  $\delta^{15}N$  and soil  
211 N (bulk and adjacent) in response to urbanization were analyzed using generalized additive  
212 models (GAMs) using the “mgcv” package (version 1.8-33; Wood 2011, 2017). Generalized

213 additive models are a flexible approach for analyzing data, as non-linear predictors can be fitted  
214 with non-parametric smoothing functions to identify effects of the predictors (Hastie and  
215 Tibshirani 1986, Wood 2017). We fitted the GAMs as:

$$216 \quad y_i = \text{intercept} + s(x_i) + e_i$$

217 where  $y_i$  was the response (white clover  $\delta^{15}\text{N}$ , bulk soil N, or adjacent soil N),  $x_i$  was the  
218 predictor (distance from the urban center, percent ISC, or NDVI),  $s$  was the non-linear  
219 smoothing function for the associated predictor, and  $e_i$  was the residual error. Thin-plate  
220 regression splines with shrinkage terms (method call: `bs = "ts"`) were used to smooth all  
221 predictors (Wood 2003), and each smooth estimate was constrained to a mean of zero. Residual  
222 error was assumed independent with a mean of zero and constant variance. White clover  $\delta^{15}\text{N}$   
223 GAMs were fitted to a Gaussian distribution and soil N GAMs were fitted with a logit link to the  
224 “betar” distribution, part of the “mgcv” family, to model non-binomial, proportional data.  
225 Similar to the nodule density mixed-effects models, high concurrency between variables (Pearson  
226  $r > |0.5|$ ) precluded the use of a single GAM with all predictor variables (Supplementary material  
227 Appendix 1 Fig. A1). Instead, all variables were integrated into the structural equation model  
228 (detailed below). All GAMs were estimated using maximum likelihood.

229 *Path analysis:* A structural equation model (SEM) was constructed to evaluate the direct and  
230 indirect causal pathways through which distance from the urban center, percent ISC, NDVI, soil  
231 N (bulk and adjacent), nodule density, and white clover  $\delta^{15}\text{N}$  interact. Basic univariate and  
232 multivariate equations are considered structural if there is sufficient evidence that the predictor  
233 or set of predictors has a causal effect on the response (Grace 2006), and SEM is the modelling  
234 of a multivariate relationship with two or more structural equations. The robustness of a SEM is  
235 based on the overall model fit to the data rather than individual causal pathways within the model

236 (Mitchell 1992, Grace 2006, Grace et al. 2010). Model fit is assessed by comparing expected and  
237 observed covariance between predictor and response variables in the SEM using  $\chi^2$  tests  
238 (Mitchell 1992, Grace 2006, Grace et al. 2010), and the SEM is considered consistent with the  
239 data when expected and observed covariance of the SEM are not different. We fit the  
240 hypothesized SEM (Fig. 2), including all causal and correlational pathways, and no removal or  
241 addition of causal pathways occurred. Distance from the urban center was fitted as an exogenous  
242 variable (i.e., independent variable that affects other variables but is not affected by other  
243 variables), while all remaining variables were fitted as endogenous variables (i.e., variables  
244 affected by the exogenous variable and that can affect other endogenous variables). Distance  
245 from the urban center was fitted to account for extraneous sources of urbanization and  
246 environmental variation not explained by the other predictors. All data were standardized by  
247 scaling individual variables to a mean of 0 and standard deviation of 1 prior to analysis, and the  
248 SEM was estimated using maximum likelihood with robust Satorra-Bentler scaled test statistics  
249 (Satorra and Bentler 2001, Rosseel 2012).

250         Results of the SEM were reported as standardized path coefficients, which show the  
251 direction and magnitude of causal pathways between variables and allow for comparison of the  
252 strength of relationships within the SEM (Wright 1934, Mitchell 1992, Grace 2006). Direct  
253 effects within the SEM are the standardized path coefficient associated with the causal pathway,  
254 while indirect effects are quantified by multiplying each path coefficient linking one variable to  
255 another within the SEM. For example, in the hypothesized SEM (Fig. 2), an indirect effect of  
256 distance from the urban center on bulk soil N is quantified as the path coefficient of distance on  
257 percent ISC (percent ISC ~ distance) times the path coefficient of percent ISC on bulk soil N  
258 (bulk soil N ~ percent ISC). The sign (+ or -) of an indirect effect is the sign of the last causal

259 pathway in the link. Indirect or compounding pathways cannot be calculated across correlational  
260 pathways as the direction of the effect is not unidirectional (Wright 1934, Grace 2006).

261 The SEM was fitted and analyzed using the “lavaan” package (version 0.6-7; Rosseel  
262 2012). All above analyses were conducted using R (version 4.0.2; R Core Team 2020) in the  
263 RStudio environment (version 1.4.869; RStudio Team 2020), with data management and figure  
264 creation facilitated using the “tidyverse” (version 1.3.0; Wickham et al. 2019). All data and R  
265 code are deposited on Zenodo (<https://doi.org/10.5281/zenodo.4459723>).

## 266 **Results**

### 267 *Nodule density, white clover $\delta^{15}\text{N}$ , and soil N*

268 Urbanization had effects on nodule density, white clover  $\delta^{15}\text{N}$ , and soil N, although the measure  
269 and effect of urbanization varied among response variables. Nodule density increased with  
270 increasing distance from the urban center ( $\beta = 0.146$ ,  $\text{SE} = 0.066$ ,  $P = 0.031$ ,  $R^2 = 0.147$ , Table 1,  
271 Fig. 3) and NDVI ( $\beta = 0.152$ ,  $\text{SE} = 0.064$ ,  $P = 0.021$ ,  $R^2 = 0.146$ , Table 1, Fig. 3), and nodule  
272 density decreased with increasing percent ISC ( $\beta = -0.199$ ,  $\text{SE} = 0.063$ ,  $P = 0.003$ ,  $R^2 = 0.151$ ,  
273 Table 1, Fig. 3). These effects translated to an increase of (estimate  $\pm$  SE)  $0.006 \pm 0.003$  in  
274 nodules per cm of root (i.e., nodule density) for each 1 km from the city centre,  $-0.004 \pm 0.001$   
275 lower nodule density for each 1 percent increase in impervious surface cover, and  $0.007 \pm 0.003$   
276 greater nodule density for each 100 unit increase in NDVI (Supplementary material Appendix 1  
277 Table A1). White clover  $\delta^{15}\text{N}$  was strongly and non-linearly predicted by distance from the urban  
278 center ( $F = 10.893$ ,  $P < 0.001$ ,  $R^2 = 0.671$ , deviance explained = 71.0%) but not percent ISC or  
279 NDVI (Table 2, Fig. 4). White clover  $\delta^{15}\text{N}$  was higher and positive at the urban (0-10 km) and  
280 rural (40-47 km) extremes of the gradient, while white clover  $\delta^{15}\text{N}$  was lower and negative for  
281 the majority of the gradient (10-40 km, Fig. 4). Bulk soil N was predicted by distance from the

282 urban center ( $\chi^2 = 3.097$ ,  $P = 0.043$ ,  $R^2 = 0.079$ , deviance explained = 11%; Supplementary  
283 material Appendix 1 Table A2, Fig. A2), where bulk soil N decreased with increasing distance  
284 from the urban center. Additionally, bulk soil N was weakly predicted by percent ISC ( $\chi^2 =$   
285  $1.722$ ,  $P = 0.098$ ,  $R^2 = 0.020$ , deviance explained = 6%; Supplementary material Appendix 1  
286 Table A2, Fig. A2), where bulk soil N increased with increasing percent ISC; bulk soil N was not  
287 predicted by NDVI (Supplementary material Appendix 1 Table A2, Fig. A2); adjacent soil N  
288 (i.e., immediately surrounding the plant) was only weakly predicted by percent ISC ( $\chi^2 = 2.277$ ,  
289  $P = 0.070$ ,  $R^2 = 0.069$ , deviance explained = 9%; Supplementary material Appendix 1 Table A2,  
290 Fig. A2).

### 291 *Path analysis*

292 The SEM demonstrated that urbanization had direct and indirect effects on ecosystem structure  
293 (i.e., soil N) and the white clover-rhizobium mutualism (Fig. 5). Our hypothesized SEM had  
294 good fit between the predicted and observed covariance ( $\chi^2 = 0.009$ ,  $df = 1$ ,  $P = 0.926$ , Fig. 5).  
295 Distance from the urban center had a direct negative relationship with white clover  $\delta^{15}\text{N}$ : as the  
296 distance from the urban center increased, white clover  $\delta^{15}\text{N}$  decreased (path coefficient =  $-0.60$ ,  
297  $SE = 0.16$ ,  $P < 0.001$ ). Bulk soil N decreased with increasing distance from the urban center  
298 (path coefficient =  $-0.29$ ,  $SE = 0.18$ ,  $P = 0.099$ ). Further effects of distance from the urban center  
299 were mediated through percent ISC on nodule density (percent ISC ~ distance path coefficient =  
300  $-0.55$ ,  $SE = 0.11$ ,  $P < 0.001$ ; nodule density ~ percent ISC path coefficient =  $-0.39$ ,  $SE = 0.23$ ,  $P$   
301  $= 0.082$ ; compound path coefficient =  $|-0.55| \times -0.39 = -0.21$ ). Although distance from the  
302 urban center was positively related to NDVI (path coefficient =  $0.63$ ,  $SE = 0.08$ ,  $P < 0.0001$ ),  
303 there were no further effects of NDVI in the SEM. Percent ISC and NDVI were negatively  
304 correlated (path coefficient =  $-0.45$ ,  $SE = 0.13$ ,  $P = 0.001$ ). Bulk soil N had a negative effect on

305 white clover  $\delta^{15}\text{N}$  (path coefficient =  $-0.23$ , SE =  $0.11$ , P =  $0.040$ ), in which increased bulk soil  
306 N decreased white clover  $\delta^{15}\text{N}$ . Nodule density and adjacent soil N were negatively correlated  
307 (path coefficient =  $-0.29$ , SE =  $0.11$ , P =  $0.010$ ). Bulk soil N was directly linked to distance from  
308 the urban center and then embedded in correlational pathways between adjacent soil N and  
309 nodule density (Fig. 5). All path coefficients and associated measures of variation are provided in  
310 the supplement (Supplementary material Appendix 1 Table A3).

### 311 **Discussion**

312 Our results show that urbanization alters the ecology of the white clover-rhizobium mutualism  
313 and associated patterns in soil nutrients, with support for this conclusion from three key results.  
314 First, we observed increased investment in nodules by white clover with decreasing impervious  
315 surface cover, increasing NDVI, and greater distance from the urban center (Q1). Second, we  
316 found that the source of nitrogen used by white clover varied along the urbanization gradient  
317 (Q2). White clover  $\delta^{15}\text{N}$  suggested acquisition of N through N-fixing rhizobia for the majority of  
318 the urbanization gradient, although increased  $\delta^{15}\text{N}$  at the urban and rural extremes suggested  
319 direct uptake of N sources from the soil. Finally, we observed direct and indirect effects of  
320 urbanization on ecosystem structure and white clover-rhizobium interactions (Q3). Urbanization  
321 altered the landscape, changing the amount of green and impervious surface cover surrounding  
322 each white clover population, with these changes cascading onto soil N, nodule density, and  
323 white clover  $\delta^{15}\text{N}$ . Given this evidence, our results suggest that urbanization alters the ecology of  
324 the white clover-rhizobia mutualism through direct and indirect pathways.

#### 325 *Effects of urbanization on the white clover-rhizobium mutualism*

326 Increasing urbanization is frequently associated with increased N deposition and enrichment  
327 (Grimm et al. 2008, Zhang et al. 2012), and legumes are expected to have lower investment in

328 rhizobia with greater N availability in the soil (Heath and Tiffin 2007, Heath et al. 2010, Regus  
329 et al. 2017). Our results supported this prediction, whereby nodule density, a common measure  
330 of investment in mutualistic interactions with rhizobia by host plants (Heath and Tiffin 2007,  
331 Heath et al. 2010), increased with decreasing effects of urbanization; these results are supported  
332 by other empirical studies in nonurban systems that found reduced investment in nodules with  
333 increased N (Heath and Tiffin 2007, Heath et al. 2010, Lau et al. 2012). In our study, nodule  
334 density was further influenced by the urban landscape and its effects on the local soil  
335 environment. Increasing distance from the urban center was associated with negative effects on  
336 bulk soil N and, while nodule density was also negatively related to impervious surface cover,  
337 there were entangled dependencies between nodule density, bulk soil N, and adjacent soil N.  
338 Given that soil N can regulate nodule formation and development (Streeter and Wong 1988,  
339 Omrane and Chiurazzi 2009) and cause shifts in the cost-benefit balance of the white clover-  
340 rhizobium mutualism (Lau et al. 2012, Weese et al. 2015, Regus et al. 2017), urban-driven  
341 changes to local soil N is a likely driver linking urbanization to altered ecological dynamics in  
342 the white clover-rhizobium mutualism.

343         In addition to nodule density, white clover  $\delta^{15}\text{N}$  varied with urbanization. Comparing  
344 relative  $\delta^{15}\text{N}$  signatures allows for assessing and tracing the source of N used by plants (Högberg  
345 1997, Robinson 2001, Craine et al. 2015). For the majority of the urbanization gradient, white  
346 clover  $\delta^{15}\text{N}$  was frequently bound between  $-1\text{‰}$  and  $0\text{‰}$ , suggesting that white clover primarily  
347 acquired N through fixation by rhizobia but other sources of N were also used (Högberg 1997,  
348 Craine et al. 2015). By contrast, populations at the urban and rural extremes of the gradient  
349 exhibited high values of  $\delta^{15}\text{N}$ , which suggests decrease reliance on rhizobia for N and increased  
350 uptake of N from the soil. A potential explanation for this pattern is the application of fertilizer



351 and management practices, which would increase white clover  $\delta^{15}\text{N}$  (Trammell et al. 2016,  
352 2020). Although we did not use experimental plant lines to determine the  $\delta^{15}\text{N}$  signatures of  
353 white clover relying solely on N fixation or on soil acquisition (Högberg 1997, Robinson 2001,  
354 Craine et al. 2015), white clover acquiring N solely through fixation by rhizobia has a  $\delta^{15}\text{N}$  of –  
355 2‰ to –1‰ (Högberg 1997). Experimentally quantifying the contributions of N fixation and soil  
356 uptake along the urbanization gradient would help elucidate the relative importance of these two  
357 processes and pools of N. Our existing data show that urbanization is at least partially  
358 responsible for variation in nodule density and white clover  $\delta^{15}\text{N}$  due to shifts in the costs and  
359 benefits of the rhizobia-plant host interaction.

#### 360 *White clover-rhizobium-soil interactions*

361 Depleted  $\delta^{15}\text{N}$  in legumes is associated with N fixation by rhizobia, and we expected increased  
362 bulk soil N to lead to a decrease in white clover  $\delta^{15}\text{N}$ , consistent with decreased fixation.  
363 Contrary to our expectation, increased bulk soil N was associated with decreased white clover  
364  $\delta^{15}\text{N}$ . While contrary to our predictions, increased N can stimulate nodulation, N fixation, and  
365 other metabolic processes in rhizobia (Streeter 1985, Simonsen et al. 2015, Forrester and  
366 Ashman 2018). Our observation of increased adjacent soil N with decreasing nodule density is  
367 consistent with inhibition of nodulation due to high N (Streeter and Wong 1988, Omrane and  
368 Chiurazzi 2009). Conversely, decreased adjacent soil N with increased nodule densities could  
369 also suggest less beneficial rhizobia that fix less N are colonizing roots, which could reduce the  
370 enrichment of soil N resulting from the white clover-rhizobium mutualism. Manipulative  
371 experiments are needed to disentangle these two possibilities to understand the causal  
372 explanation for our observed patterns.

373 Our expectation that lower white clover  $\delta^{15}\text{N}$  would increase adjacent soil N was not  
374 supported. While both distance from the urban center and bulk soil N negatively affected white  
375 clover  $\delta^{15}\text{N}$ , we did not observe a feedback from white clover  $\delta^{15}\text{N}$  to adjacent soil N. In  
376 contrast, nodule density was negatively correlated to adjacent soil N, despite predicting a  
377 positive correlation. A potential explanation for this response is that white clover produced fewer  
378 and larger nodules: larger nodules can convey greater benefits to white clover, increasing N  
379 fixation and associated effects on soil N (Porter and Simms 2014, Gano-Cohen et al. 2020). We  
380 only measured nodule count and density, so we were unable to test this hypothesis.

### 381 *Urbanization and soil nitrogen*

382 Urbanization had expected effects on soil N, but this was dependent on interactions between  
383 white clover and rhizobium and their associated effects on soil and plant N. Bulk soil N was  
384 greatest in urban areas, which was consistent with our predictions and observed patterns in other  
385 studies (Pouyat et al. 2015, Regus et al. 2017, Trammell et al. 2020), and increased soil N is  
386 likely a result of N deposition linked to urbanization (Grimm et al. 2008, Zhang et al. 2012,  
387 Regus et al. 2017). Adjacent soil N showed a similar but weaker pattern to bulk soil N in  
388 response to impervious surface cover. These results in combination with the SEM show that  
389 local soil N is largely governed by exogenous N inputs (e.g., rain, synthetic fertilizer, pets) into  
390 the surrounding soils and perhaps less influenced by modification of N pools by the white  
391 clover-rhizobium mutualism. In contrast to soil N, white clover  $\delta^{15}\text{N}$  showed a complex and non-  
392 linear relationship with urbanization. Specifically, white clover  $\delta^{15}\text{N}$  was lower and negative for  
393 the majority of the urbanization gradient but highest and positive at the urban and rural extremes  
394 of the gradient. Additional evidence from the SEM suggests that increased bulk soil N could  
395 have stimulated N fixation, contrary to our expectation of lower white clover  $\delta^{15}\text{N}$  with less soil

396 N. Taken together, these lines of evidence suggest that the effects of urbanization on the white  
397 clover-rhizobium mutualism are complex, with local variation in soil N influencing dynamics  
398 between white clover, rhizobium, and N.

399 We quantified total soil N to answer our focal questions for this study, but other measures  
400 of soil N can be important to consider. For example, total N does not discriminate between  
401 different types of N (e.g., NO<sub>3</sub>, NO<sub>2</sub>, and NH<sub>3</sub>). Identifying the type and quantifying the relative  
402 amounts of each species of N could provide a clearer link between urbanization and N  
403 deposition, as different forms of N are important for both plant and rhizobia physiology and  
404 metabolism (Wallsgrove et al. 1983). In addition to further investigation of soil N content, soil  
405  $\delta^{15}\text{N}$  could integrate inputs, metabolic processes, and transformations of N in ecosystems  
406 (Robinson 2001). For example, a typical fertilizer has a  $\delta^{15}\text{N}$  around 0‰ and other  
407 anthropogenic sources have enriched  $\delta^{15}\text{N}$  signatures (Robinson 2001, Michener and Lajtha  
408 2007), which can be reflected in the tissues of organisms utilizing these sources (Robinson 2001,  
409 Trammell et al. 2016). Urban environments frequently have increased and less variable soil  $\delta^{15}\text{N}$   
410 relative to nearby nonurban or rural environments (Trammell et al. 2020); therefore, using soil  
411  $\delta^{15}\text{N}$  could also help to identify a direct link from urbanization to changes in soil N and  
412 ultimately legume-rhizobia mutualisms.

#### 413 *Limitations*

414 Our study had several limitations that contextualize our conclusions. First, we focused on the  
415 focal white clover-rhizobia mutualism without considering how other coexisting plants could  
416 affect the focal mutualism and soil nutrient patterns. White clover was frequently collected in  
417 patches of grass, especially *Poa annua*, and near other legumes, predominantly *Medicago*  
418 *lupulina* and occasionally other *Trifolium* species (*T. pratense*, *T. hybridum*; DMS, personal

419 observation). White clover competes for space and nutrients with these other plants and this  
420 competition could have affected the response of the focal mutualism to urbanization, especially if  
421 plant species composition changed along the urbanization gradient as has been reported  
422 elsewhere (Hope et al. 2003, Knapp et al. 2008, 2012). Other legumes might have also affected  
423 the observed patterns in soil N, although we did explicitly avoid collecting soil from patches of  
424 other legume species so this possibility is unlikely. Second, we did not investigate how the  
425 microbial community beyond rhizobium in the soil and in the roots of white clover varies with  
426 urbanization. Microbes are crucial for plant community assembly and responses to biotic and  
427 abiotic stress (van der Heijden et al. 2008, Fitzpatrick et al. 2018). Additionally, the ostensibly  
428 pairwise mutualistic interaction between white clover and rhizobia can be altered in the presence  
429 of other bacteria or fungi (Heath and Tiffin 2007, García Parisi et al. 2015). With recent studies  
430 documenting changes in microbial diversity and composition in response to urbanization (Xu et  
431 al. 2014, Reese et al. 2016), it is plausible that variation in microbial communities in the mosaic  
432 of urban environments could alter the ecological effects of the white clover-rhizobium  
433 interaction and shift the cost-benefit balance of the mutualism (García Parisi et al. 2015,  
434 Burghardt et al. 2018, Batstone et al. 2020). Notwithstanding these limitations, our study shows  
435 that urbanization alters the ecological and ecosystem-level effects of the white clover-rhizobia  
436 mutualism.

#### 437 *Conclusion*

438 Our study represents an evaluation of the effects of urbanization on an ecologically-important  
439 mutualism. To date, urban ecological research has principally evaluated species interactions by  
440 focusing on plant-pollinator and plant-herbivore interactions (Youngsteadt et al. 2015, Aronson  
441 et al. 2016, Harrison et al. 2018, Miles et al. 2019, Rivkin et al. 2020). We have extended this

442 field by investigating the mutualistic interaction between a plant (white clover) and its  
443 mutualistic, microbial symbionts (rhizobia). White clover invested in more nodules and relied on  
444 rhizobia for N fixation with less urbanization, and increased urbanization directly and negatively  
445 affected investment in rhizobia by white clover, with soil N playing a critical role linking  
446 urbanization to the mutualistic interaction between white clover and rhizobia. In conclusion, our  
447 results demonstrate the direct and indirect effects of urbanization on the cost-benefit balance and  
448 ecological consequences of a legume-rhizobium mutualism.

#### 449 **Acknowledgements**

450 We thank S. Munim and K. Murray-Stoker for assistance with field work and C. Sastropranoto  
451 for help with soil sample processing. We thank R. Rivkin, J. Santangelo, L. Albano, S. Breitbart,  
452 S. Koch, and L. Miles for providing comments on earlier drafts of the manuscript.

#### 453 **Funding**

454 This work was funded by an NSERC Discovery Grant, Canada Research Chair, and E.W.R.  
455 Steacie Fellowship to M. Johnson.

#### 456 **Author Contributions**

457 DMS and MTJ conceived the study; DMS and MTJ conducted field sampling; DMS processed  
458 samples in the lab; DMS performed statistical analyses with input from MTJ; DMS and MTJ  
459 interpreted results; DMS led the writing of the manuscript with extensive contributions from  
460 MTJ.

461 **References**

- 462 Andrews, M. and Andrews, M. E. 2017. Specificity in legume-rhizobia symbioses. - *Int. J. Mol.*  
463 *Sci.* 18: 705.
- 464 Aronson, M. F. J. et al. 2016. Hierarchical filters determine community assembly of urban  
465 species pools. - *Ecology* 97: 2952–2963.
- 466 Baker, M. J. and Williams, W. M. 1987. *White Clover*. - C.A.B. International.
- 467 Barrett, J. P. and Silander, J. A. 1992. Seedling recruitment limitation in white clover (*Trifolium*  
468 *repens*; Leguminosae). - *Am. J. Bot.* 79: 643–649.
- 469 Barton, K. 2020. MuMIn: Multi-Model Inference.
- 470 Bates, D. et al. 2015. Fitting linear mixed-effects models using lme4. - *J. Stat. Softw.* 67: 1–48.
- 471 Batstone, R. T. et al. 2020. Experimental evolution makes microbes more cooperative with their  
472 local host genotype. - *Science* 370: 476–478.
- 473 Burghardt, L. T. et al. 2018. Select and resequence reveals relative fitness of bacteria in  
474 symbiotic and free-living environments. - *Proc. Natl. Acad. Sci. U. S. A.* 115: 2425–  
475 2430.
- 476 Cleland, E. E. and Harpole, W. S. 2010. Nitrogen enrichment and plant communities. - *Ann. N.*  
477 *Y. Acad. Sci.* 1195: 46–61.
- 478 Craine, J. M. et al. 2015. Ecological interpretations of nitrogen isotope ratios of terrestrial plants  
479 and soils. - *Plant Soil* 396: 1–26.
- 480 De León, L. F. et al. 2019. Urbanization erodes niche segregation in Darwin’s finches. - *Evol.*  
481 *Appl.* 12: 1329–1343.
- 482 Fitzpatrick, C. R. et al. 2018. Assembly and ecological function of the root microbiome across  
483 angiosperm plant species. - *Proc. Natl. Acad. Sci. U. S. A.* 115: E1157–E1165.
- 484 Forrester, N. J. and Ashman, T.-L. 2018. Nitrogen fertilization differentially enhances nodulation  
485 and host growth of two invasive legume species in an urban environment. - *J. Urban*  
486 *Ecol.* 4: juy021.
- 487 Galloway, J. N. et al. 2003. The nitrogen cascade. - *BioScience* 53: 341.
- 488 Gano-Cohen, K. A. et al. 2020. Recurrent mutualism breakdown events in a legume rhizobia  
489 metapopulation. - *Proc. R. Soc. B Biol. Sci.* 287: 20192549.
- 490 García Parisi, P. A. et al. 2015. Multi-symbiotic systems: functional implications of the  
491 coexistence of grass-endophyte and legume-rhizobia symbioses. - *Oikos* 124: 553–560.
- 492 Grace, J. 2006. *Structural Equation Modeling and Natural Systems*. - Cambridge University  
493 Press.
- 494 Grace, J. B. et al. 2010. On the specification of structural equation models for ecological  
495 systems. - *Ecol. Monogr.* 80: 67–87.
- 496 Grimm, N. B. et al. 2008. Global change and the ecology of cities. - *Science* 319: 756–760.
- 497 Groffman, P. M. et al. 2014. Ecological homogenization of urban USA. - *Front. Ecol. Environ.*  
498 *12*: 74–81.
- 499 Harrison, J. G. et al. 2018. Deconstruction of a plant-arthropod community reveals influential  
500 plant traits with nonlinear effects on arthropod assemblages (J Koricheva, Ed.). - *Funct.*  
501 *Ecol.* 32: 1317–1328.
- 502 Hartig, F. 2020. DHARMA: Residual Diagnostics for Hierarchical (Multi-Level / Mixed)  
503 Regression Models.
- 504 Hastie, T. and Tibshirani, R. 1986. Generalized additive models. - *Stat. Sci.* 1: 291–310.
- 505 Heath, K. D. and Tiffin, P. 2007. Context dependence in the coevolution of plant and rhizobial  
506 mutualists. - *Proc. R. Soc. B Biol. Sci.* 274: 1905–1912.

- 507 Heath, K. D. et al. 2010. Mutualism variation in the nodulation response to nitrate. - J. Evol.  
508 Biol. 23: 2494–2500.
- 509 Hijmans, R. J. 2019. geosphere: Spherical Trigonometry.
- 510 Hirsch, A. M. 1992. Developmental biology of legume nodulation. - New Phytol. 122: 211–237.
- 511 Högborg, P. 1997. <sup>15</sup>N natural abundance in soil-plant systems. - New Phytol. 137: 179–203.
- 512 Hope, D. et al. 2003. Socioeconomics drive urban plant diversity. - Proc. Natl. Acad. Sci. U. S.  
513 A. 100: 8788–8792.
- 514 Irwin, R. E. et al. 2014. Plant–animal interactions in suburban environments: implications for  
515 floral evolution. - Oecologia 174: 803–815.
- 516 Johnson, M. T. J. et al. 2018. Contrasting the effects of natural selection, genetic drift and gene  
517 flow on urban evolution in white clover (*Trifolium repens*). - Proc. R. Soc. B Biol. Sci.  
518 285: 20181019.
- 519 Kaye, J. et al. 2006. A distinct urban biogeochemistry? - Trends Ecol. Evol. 21: 192–199.
- 520 Kembell, W. D. and Marshall, C. 1995. Clonal integration between parent and branch stolons in  
521 white clover: a developmental study. - New Phytol. 129: 513–521.
- 522 Knapp, S. et al. 2008. Challenging urban species diversity: contrasting phylogenetic patterns  
523 across plant functional groups in Germany. - Ecol. Lett. 11: 1054–1064.
- 524 Knapp, S. et al. 2012. Phylogenetic and functional characteristics of household yard floras and  
525 their changes along an urbanization gradient. - Ecology 93: S83–S98.
- 526 Kuznetsova, A. et al. 2017. lmerTest package: tests in linear mixed effects models. - J. Stat.  
527 Softw. 82: 1–26.
- 528 Lau, J. A. et al. 2012. Direct and interactive effects of light and nutrients on the legume-rhizobia  
529 mutualism. - Acta Oecologica 39: 80–86.
- 530 Leibold, M. A. and Chase, J. M. 2017. Metacommunity Ecology. - Princeton University Press.
- 531 Martínez-Romero, E. and Caballero-Mellado, J. 1996. Rhizobium phylogenies and bacterial  
532 genetic diversity. - Crit. Rev. Plant Sci. 15: 113–140.
- 533 McKinney, M. L. 2002. Urbanization, biodiversity, and conservation. - BioScience 52: 883–890.
- 534 Michener, R. and Lajtha, K. 2007. Stable Isotopes in Ecology and Environmental Science. -  
535 Blackwell Publishing.
- 536 Miles, L. S. et al. 2019. Urbanization shapes the ecology and evolution of plant-arthropod  
537 herbivore interactions. - Front. Ecol. Evol. 7: 310.
- 538 Mitchell, R. J. 1992. Testing evolutionary and ecological hypotheses using path analysis and  
539 structural equation modelling. - Funct. Ecol. 6: 123–129.
- 540 Nakagawa, S. et al. 2017. The coefficient of determination  $R^2$  and intra-class correlation  
541 coefficient from generalized linear mixed-effects models revisited and expanded. - J. R.  
542 Soc. Interface 14: 20170213.
- 543 Omrane, S. and Chiurazzi, M. 2009. A variety of regulatory mechanisms are involved in the  
544 nitrogen-dependent modulation of the nodule organogenesis program in legume roots. -  
545 Plant Signal. Behav. 4: 1066–1068.
- 546 Parsons, A. W. et al. 2019. Urbanization focuses carnivore activity in remaining natural habitats,  
547 increasing species interactions. - J. Appl. Ecol. 56: 1894–1904.
- 548 Poole, P. et al. 2018. Rhizobia: from saprophytes to endosymbionts. - Nat. Rev. Microbiol. 16:  
549 291–303.
- 550 Porter, S. S. and Simms, E. L. 2014. Selection for cheating across disparate environments in the  
551 legume-rhizobium mutualism. - Ecol. Lett. 17: 1121–1129.
- 552 Pouyat, R. V. et al. 2015. A global comparison of surface soil characteristics across five cities: a



- 553 test of the urban ecosystem convergence hypothesis. - *Soil Sci.* 180: 136–145.
- 554 R Core Team 2020. R: a language and environment for statistical computing. - R Foundation  
555 for Statistical Computing.
- 556 R Studio Team 2020. RStudio: Integrated development for R. - RStudio, Inc.
- 557 Raupp, M. J. et al. 2010. Ecology of herbivorous arthropods in urban landscapes. - *Annu. Rev.*  
558 *Entomol.* 55: 19–38.
- 559 Reese, A. T. et al. 2016. Urban stress is associated with variation in microbial species  
560 composition—but not richness—in Manhattan. - *ISME J.* 10: 751–760.
- 561 Regus, J. U. et al. 2017. Nitrogen deposition decreases the benefits of symbiosis in a native  
562 legume. - *Plant Soil* 414: 159–170.
- 563 Rivkin, L. R. et al. 2020. Variation in pollinator-mediated plant reproduction across an  
564 urbanization gradient. - *Oecologia* 192: 1073–1083.
- 565 Robinson, D. 2001.  $\delta^{15}\text{N}$  as an integrator of the nitrogen cycle. - *Trends Ecol. Evol.* 16: 153–162.
- 566 Rocha, E. A. and Fellowes, M. D. E. 2018. Does urbanization explain differences in interactions  
567 between an insect herbivore and its natural enemies and mutualists? - *Urban Ecosyst.* 21:  
568 405–417.
- 569 Rosseel, Y. 2012. lavaan: an R package for structural equation modeling. - *J. Stat. Softw.* 48: 1–  
570 36.
- 571 Santangelo, J. S. et al. 2020. Multivariate phenotypic divergence along an urbanization gradient.  
572 - *Biol. Lett.* 16: 20200511.
- 573 Satorra, A. and Bentler, P. M. 2001. A scaled difference chi-square test statistic for moment  
574 structure analysis. - *Psychometrika* 66: 507–514.
- 575 Satterthwaite, F. E. 1946. An approximate distribution of estimates of variance components. -  
576 *Biom. Bull.* 2: 110–114.
- 577 Seto, K. C. et al. 2010. The new geography of contemporary urbanization and the environment. -  
578 *Annu. Rev. Environ. Resour.* 35: 167–194.
- 579 Simonsen, A. K. et al. 2015. Short-term fertilizer application alters phenotypic traits of symbiotic  
580 nitrogen fixing bacteria. - *PeerJ* 3: e1291.
- 581 Stevens, C. J. et al. 2018. Atmospheric nitrogen deposition in terrestrial ecosystems: Its impact  
582 on plant communities and consequences across trophic levels. - *Funct. Ecol.* 32: 1757–  
583 1769.
- 584 Streeter, J. G. 1985. Nitrate inhibition of legume nodule growth and activity. - *Plant Physiol.* 77:  
585 325–328.
- 586 Streeter, J. and Wong, P. P. 1988. Inhibition of legume nodule formation and  $\text{N}_2$  fixation by  
587 nitrate. - *Crit. Rev. Plant Sci.* 7: 1–23.
- 588 Thompson, K. A. et al. 2016. Urbanization drives the evolution of parallel clines in plant  
589 populations. - *Proc. R. Soc. B Biol. Sci.* 283: 20162180.
- 590 Thomson, D. M. and Page, M. L. 2020. The importance of competition between insect  
591 pollinators in the Anthropocene. - *Curr. Opin. Insect Sci.* 38: 55–62.
- 592 Trammell, T. L. E. et al. 2016. Plant nitrogen concentration and isotopic composition in  
593 residential lawns across seven US cities. - *Oecologia* 181: 271–285.
- 594 Trammell, T. L. E. et al. 2020. Urban soil carbon and nitrogen converge at a continental scale. -  
595 *Ecol. Monogr.* 90: e01401.
- 596 Tuck, S. L. et al. 2014. MODISTools - downloading and processing MODIS remotely sensed  
597 data in R. - *Ecol. Evol.* 4: 4658–4668.
- 598 van der Heijden, M. G. A. et al. 2008. The unseen majority: soil microbes as drivers of plant



- 599 diversity and productivity in terrestrial ecosystems. - *Ecol. Lett.* 11: 296–310.
- 600 Vergeer, P. et al. 2008. Geographical variation in the response to nitrogen deposition in  
601 *Arabidopsis lyrata petraea*. - *New Phytol.* 179: 129–141.
- 602 Wallsgrove, R. M. et al. 1983. Photosynthesis, photorespiration and nitrogen metabolism. - *Plant*  
603 *Cell Environ.* 6: 301–309.
- 604 Weese, D. J. et al. 2015. Long-term nitrogen addition causes the evolution of less-cooperative  
605 mutualists. - *Evolution* 69: 631–642.
- 606 Wickham, H. et al. 2019. Welcome to the tidyverse. - *J. Open Source Softw.* 4: 1686.
- 607 Williams, N. S. G. et al. 2009. A conceptual framework for predicting the effects of urban  
608 environments on floras. - *J. Ecol.* 97: 4–9.
- 609 Wisz, M. S. et al. 2013. The role of biotic interactions in shaping distributions and realised  
610 assemblages of species: implications for species distribution modelling. - *Biol. Rev.* 88:  
611 15–30.
- 612 Wood, S. N. 2003. Thin plate regression splines. - *J. R. Stat. Soc. Ser. B Stat. Methodol.* 65: 95–  
613 114.
- 614 Wood, S. N. 2011. Fast stable restricted maximum likelihood and marginal likelihood estimation  
615 of semiparametric generalized linear models. - *J. R. Stat. Soc. Ser. B Stat. Methodol.* 73:  
616 3–36.
- 617 Wood, S. N. 2017. *Generalized Additive Models An Introduction with R, Second Edition.* -  
618 Chapman and Hall/CRC.
- 619 Wright, S. 1934. The method of path coefficients. - *Ann. Math. Stat.* 5: 161–215.
- 620 Xu, H.-J. et al. 2014. Does urbanization shape bacterial community composition in urban park  
621 soils? A case study in 16 representative Chinese cities based on the pyrosequencing  
622 method. - *FEMS Microbiol. Ecol.* 87: 182–192.
- 623 Youngsteadt, E. et al. 2015. Do cities simulate climate change? A comparison of herbivore  
624 response to urban and global warming. - *Glob. Change Biol.* 21: 97–105.
- 625 Zhang, L. et al. 2012. Nitrogen deposition to the United States: distribution, sources, and  
626 processes. - *Atmospheric Chem. Phys.* 12: 4539–4554.
- 627 Zheng, M. et al. 2019. Global pattern and controls of biological nitrogen fixation under nutrient  
628 enrichment: A meta-analysis. - *Glob. Change Biol.* 25: 3018–3030.
- 629 Ziter, C. 2016. The biodiversity-ecosystem service relationship in urban areas: a quantitative  
630 review. - *Oikos* 125: 761–768.

631 **Figures (with captions)**

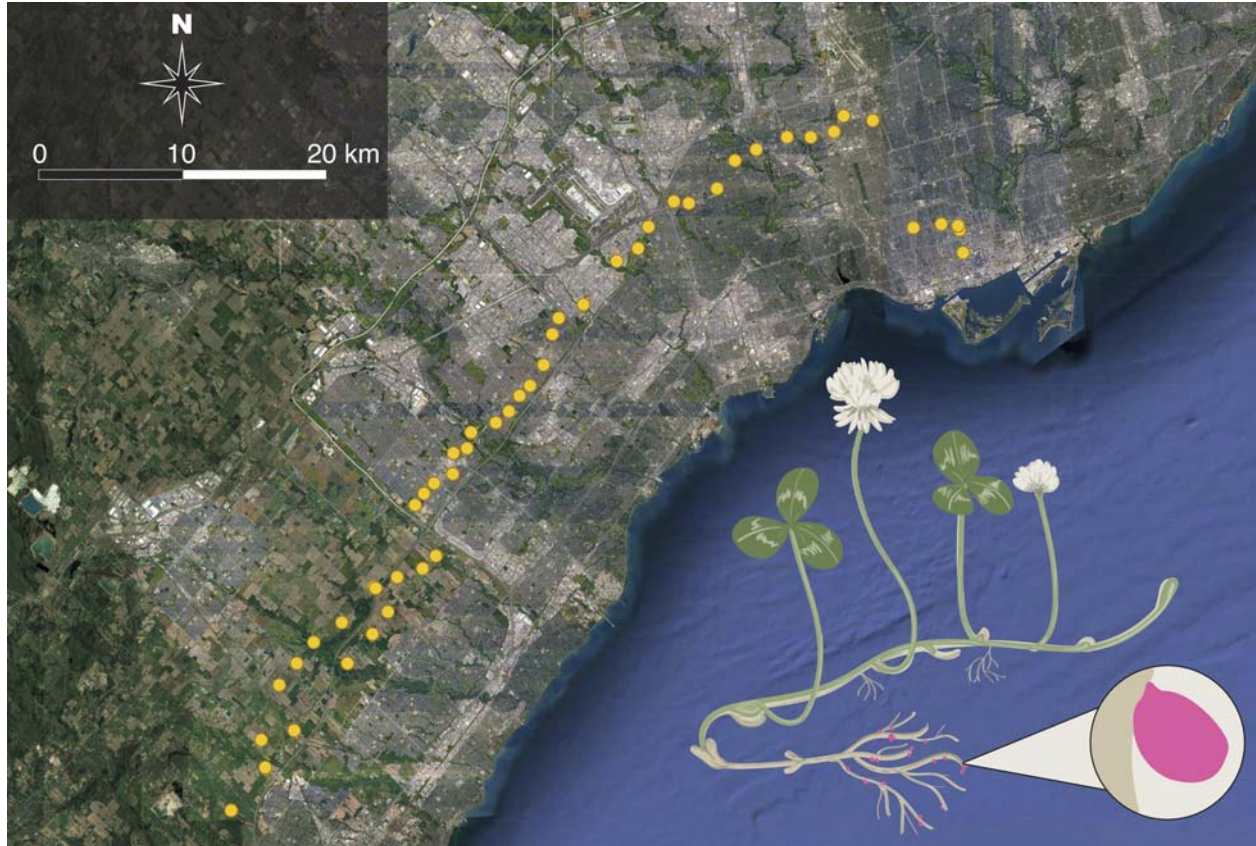

632

633 Figure 1: Map of the urbanization gradient in the Greater Toronto Area, ON, Canada displaying

634 all 49 sampling sites for the study. The inset displays an illustration of a typical white clover

635 individual sampled in the field, and the callout depicts a nodule attached to the root. Satellite

636 imagery was taken in 2018 and retrieved from Google. The illustration was provided by Kelly

637 Murray-Stoker.

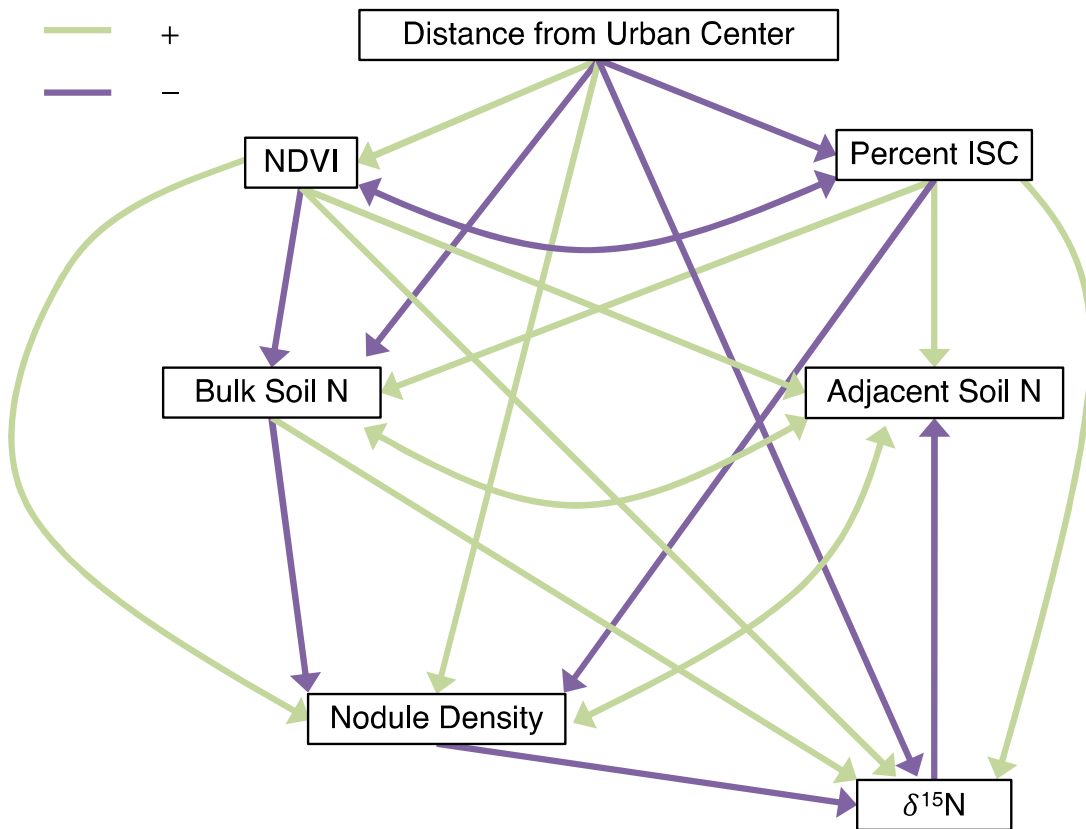

638

639 Figure 2: Hypothesized path model specifying causal and correlational pathways and the  
640 associated direction of each relationship. The structural set of linear equations for each causal or  
641 correlational pathway can be described by variables linking the response to the predictor (e.g.,  
642 bulk soil N ~ percent ISC + NDVI + distance). Distance from the urban center was fitted to  
643 account for extraneous sources of urbanization and environmental variation not explained by  
644 other predictors. We hypothesized that changes to local environments in the urban landscape  
645 would manifest in direct effects of urbanization (i.e., percent ISC and NDVI) on both soil N and  
646 the legume-rhizobia mutualism (i.e., nodule density and white clover  $\delta^{15}\text{N}$ ), with indirect effects  
647 of urbanization mediated through soil N.

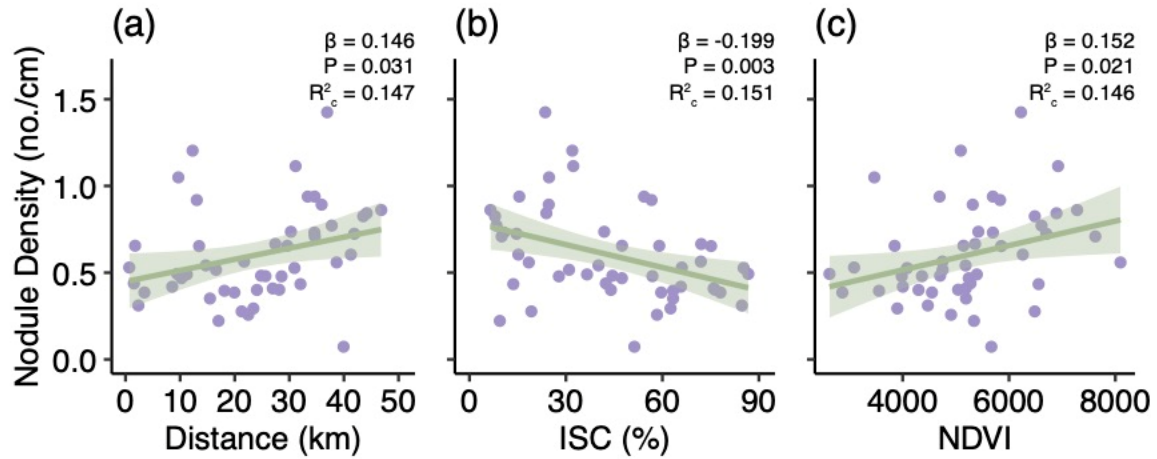

648

649 Figure 3: Plots of nodule density against (a) distance from the urban center (Distance), (b)  
650 percent impervious surface cover (ISC), and (c) normalized difference vegetation index (NDVI).  
651 Lines are lines-of-best-fit ( $\pm$  standard error) from a linear mixed effects model, with the  
652 parameter coefficient ( $\beta$ ), P-value, and  $R^2_{\text{conditional}}$  also provided.

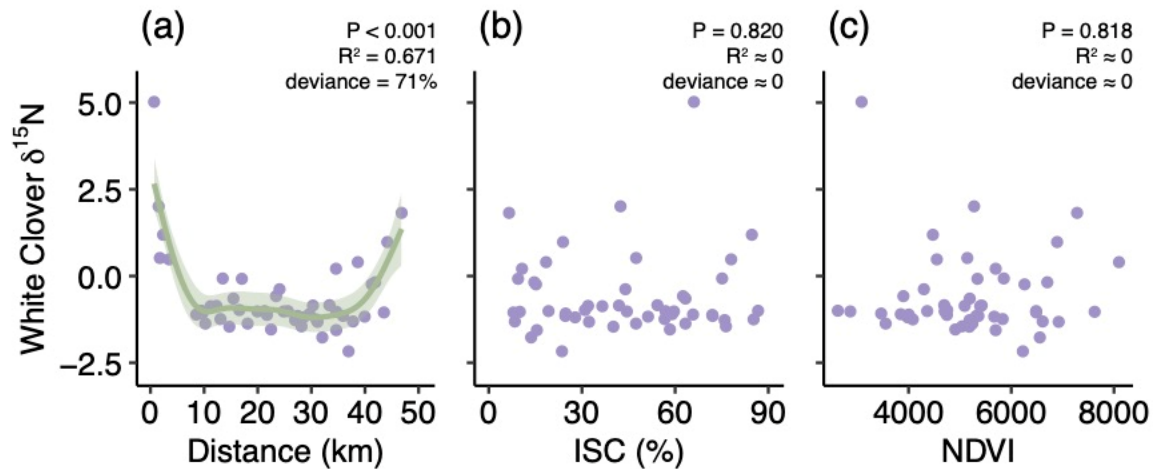

653

654 Figure 4: Plots of white clover  $\delta^{15}\text{N}$  against (a) distance from the urban center (Distance), (b)  
655 percent impervious surface cover (ISC), and (c) normalized difference vegetation index (NDVI).

656 Lines are smoothed curves ( $\pm$  standard error) from a generalized additive model, with the P-  
657 value,  $R^2$ , and deviance explained (deviance) also provided. Percent ISC and NDVI were not  
658 ecologically-relevant predictors of white clover  $\delta^{15}\text{N}$  so lines are not displayed.

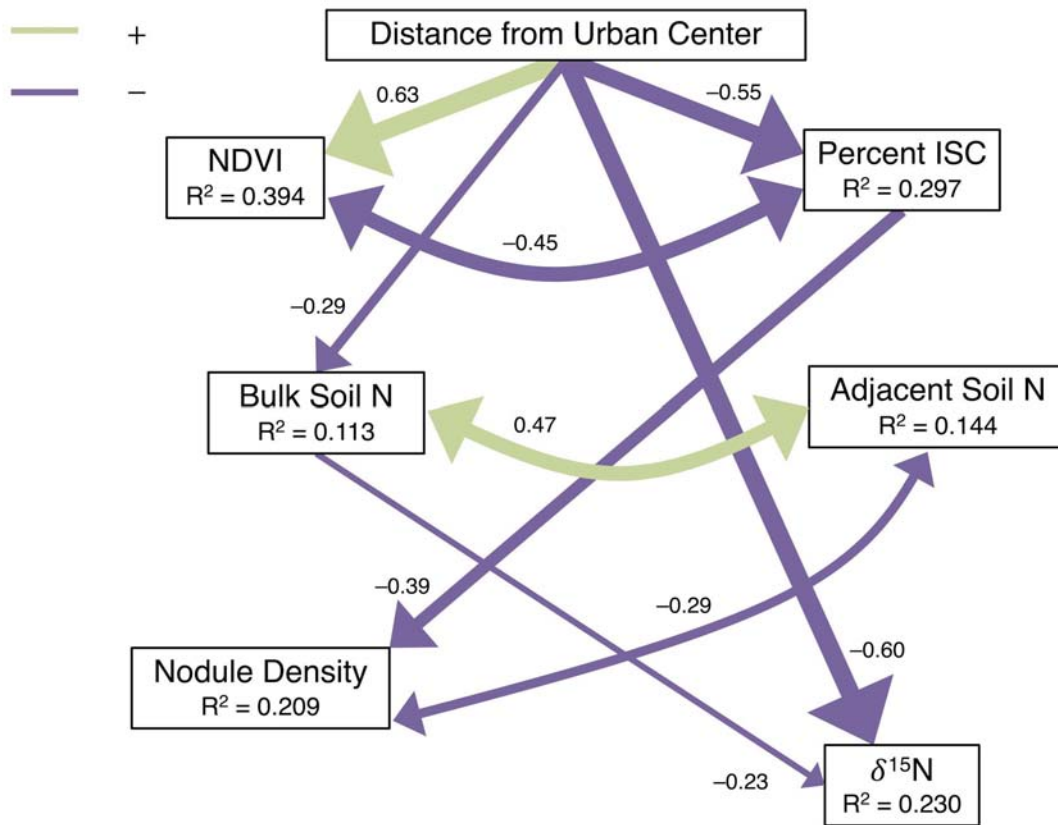

659

660 Figure 5: Path diagram showing the causal interactions between distance from the urban center,  
661 percent impervious surface cover (ISC), normalized difference vegetation index (NDVI), soil N  
662 (bulk and adjacent), nodule density, and white clover  $\delta^{15}\text{N}$ . The model had good fit between the  
663 predicted and observed covariance ( $\chi^2 = 0.009$ ,  $df = 1$ ,  $P = 0.926$ ). Lines represent influential  
664 causal pathways in the model, with single-headed arrows indicating an unidirectional pathway  
665 and double-headed arrows indicating a correlation between variables. Purple lines represent  
666 positive pathways, while green lines represent negative pathways; non-influential pathways are  
667 not displayed. Standardized path coefficients, which show the direction and magnitude of the  
668 relationship between variables, are reported next to each line and line widths are scaled relative  
669 to the magnitude of the path coefficients. The  $R^2$  is reported for each endogenous variable.



670 **Tables (with captions)**

671 Table 1: Summary of the nodule density linear mixed-effects model comparing nodule density  
672 against distance from the urban center (distance), percent impervious surface cover (ISC), and  
673 normalized difference vegetation index (NDVI). We report coefficients ( $\beta$ , slope parameter),  
674 standard errors of the coefficients (SE), numerator degrees-of-freedom (NDF), denominator  
675 degrees-of-freedom (DDF) approximated following the Satterthwaite method, partial  $F$ -statistics  
676 calculated from Type II sums-of-squares, P-values, and  $R^2_{\text{conditional}}$ .

| <b>Term</b> | <b><math>\beta</math></b> | <b>SE</b> | <b>NDF</b> | <b>DDF</b> | <b><math>F</math></b> | <b>P-value</b> | <b><math>R^2_{\text{conditional}}</math></b> |
|-------------|---------------------------|-----------|------------|------------|-----------------------|----------------|----------------------------------------------|
| Distance    | 0.146                     | 0.066     | 1          | 47.723     | 4.949                 | 0.031          | 0.147                                        |
| Percent ISC | -0.199                    | 0.063     | 1          | 51.839     | 10.042                | 0.003          | 0.151                                        |
| NDVI        | 0.152                     | 0.064     | 1          | 55.268     | 5.640                 | 0.021          | 0.146                                        |

677

678 Table 2: Summary of the white clover  $\delta^{15}\text{N}$  generalized additive models (GAMs) comparing  
679 white clover  $\delta^{15}\text{N}$  against distance from the urban center (distance), percent impervious surface  
680 cover (ISC), and NDVI. We report estimated degrees-of-freedom (EDF), which can differ from 1  
681 because the values are penalized for smoothed parameters; an EDF = 1 would suggest a linear  
682 relationship. Reference degrees-of-freedom (REF.df) are used for calculating  $F$ -statistics and  $P$ -  
683 values for each smoothed term. We also report the  $R^2$  and deviance explained for each model, as  
684 well as the  $\chi^2$  statistic associated with the smooth term.

| <b>Term</b> | <b>EDF</b> | <b>REF.df</b> | <b><math>F</math></b> | <b>P-value</b> | <b><math>R^2</math></b> | <b>Deviance Explained</b> |
|-------------|------------|---------------|-----------------------|----------------|-------------------------|---------------------------|
| Distance    | 5.654      | 9             | 10.893                | < 0.001        | 0.671                   | 71%                       |
| Percent ISC | < 0.001    | 9             | < 0.001               | 0.820          | $\cong$ 0.000           | $\cong$ 0%                |
| NDVI        | < 0.001    | 9             | < 0.001               | 0.818          | $\cong$ 0.000           | $\cong$ 0%                |

685 Note: As the white clover  $\delta^{15}\text{N}$  GAMs were fitted to a Gaussian error distribution,  $F$ -statistics  
686 were calculated instead of  $\chi^2$ -statistics.
